# Supplementary material for: Appetite regulating genes may contribute to herbivory versus carnivory trophic divergence in haplochromine cichlids
Source: PeerJ. 2020 Jan 20;8:e8375. doi: 10.7717/peerj.8375 (PMC6977467; doi:10.7717/peerj.8375)
Supplement: Table S1 [file peerj-08-8375-s001.xlsx]

## Sheet: qPCR primers
	qPCR Primer sequences and information about candidate reference genes.
	Symbol	Gene Description	Primer Sequence (5’- 3’)	Product Size (bp)	Efficiency (E %)	R2 *	Amplicon Melting Temperature (°C)	Accession ID
	actb1	Actin Beta 1	F_CCCTCTTCCAGCCTTCCTTCCT	130	105.3	0.997	86.2 ± 0.2	XM_005946208.2
			R_GTACCTCCAGACAGCACGGTGTTG
	b2m	Beta-2-Microglobulin	F_ACCCCCCTGACATCACCATCA	107	107.1	0.996	83.1 ± 0.2	XM_026147953.1
			R_CTTGGTCAGATGGAAGTGCCAGTC
	gapdh	Glyceraldehyde-3-phosphate Dehydrogenase	F_ATCAAGAAGGTTGTGAAGGCTGC	83	96.5	0.998	83.2 ± 0.3	XM_005925254.2
			R_TCTGTGGACACGACCTGGTG
	hprt1	Hypoxanthine Phosphoribosyltransferase 1	F_CTGTCTACTCTGACAGGCAAGAATG	137	96.3	0.998	85.91 ± 0.2	XM_005916590.2
			R_CTCTTCACCAGCAAACTCGCTAC
	rps11	Ribosomal Protein S11	F_GTATTCTCTCTGGTGTGGTGACC	163	94.2	0.996	79.8 ± 0.2	XM_005920301.2
			R_ATGTCTCCAACTGTGACGTCTCTA
	rpl8	Ribosomal Protein S18	F_CATCCCTGAGAAGTTCCAGCACA	103	92.1	0.995	79.6 ± 0.3	XM_005945472.2
			R_TCTGCCAACACCCTTGATGG
	tbp	TATA Box Binding Protein	F_CCTCAGGGAGCCATGACC	75	104	0.997	75.1 ± 0.2	XM_014340289.1
			R_CTGGGGTGTCAGACCAGAG
	tuba1	Tubulin Alpha 1	F_GAGACTGGAGCTGGAAAGCACGTC	152	98.7	0.998	82.44 ± 0.2	XM_005918877.2
			R_CGGGCGTAGTTATTGGCAGCATC
	(*) R2, correlation coefficient of the slope of the standard curve.
	qPCR Primer sequences and information about candidate target genes.
	Symbol	Gene Description	Primer Sequence (5’- 3’)	Product Size (bp)	Efficiency (E %)	R2 *	Amplicon Melting Temperature (°C)	Accession ID
	agrp2	Agouti related protein 2	F_GCTCGCCTCCTCGCTGGT	202	101.7	0.993	84.3 ± 0.1	XM_005929209.1
			R_TGCAGACGTGTCCTCATCATAGG
	apln	Apelin	F_AGGCTTACACACCATCGCAACAG	120	95.7	0.996	72.1 ± 0.2	XM_014333997.1
			R_GCCTGGTGAGTAATATGAGCACACAC
	cart	Cocaine- & Amphetamine-Regulated Transcript	F_CGCTCACTGGATTTCACCCTGA	142	105.3	0.997	83.2 ± 0.2	XM_005949061.2
			R_GCTCCCCTGCGTCACACG
	cck	Cholecystokinin Triacontatriapeptide	F_CCCATCTCTGCTCTCTCTGAAGCT	188	106.1	0.993	86.3 ± 0.2	XM_005940862.1
			R_CGCACAGAACCTTTCCTGGAGG
	crh	Corticotropin Releasing Hormone	F_GCAGCAGCAGGACGAGGAAG	81	96	0.996	80.2 ± 0.3	XM_005946397.2
			R_AGGTGGAAGGTCAGGTCCAGAG
	drd1	Dopamine Receptor D1	F_CAGTGCAGCTCAACTGGCATAAAGC	144	103.8	0.993	82 ± 0.3	XM_005916412.2
			R_GAGAGGTGGAGATGGCGTAGG
	gabra1	Gamma-Aminobutyric Acid (GABA) A Receptor Alpha 1	F_CTGCCAGGACTGTCTTTGGAGTGAC	147	97.4	0.994	84 ± 0.1	XM_014340055.1
			R_TGAGGGCTGAGAAGACAAAGGC
	hcrt	Hypocretin (Orexin) Neuropeptide	F_GAGCAGATGTTGTGGTTCCCCA	94	103.8	0.996	81.2 ± 0.1	XM_005920350.2
			R_GTAGCAGCAGCAAGACCAATACCATG
	nmu	Neuromedin U	F_AGCATCACCTTCGCAGCCC	91	104.3	0.992	78.3 ± 0.2	XM_014333883.1
			R_GCCCCTGATCTGCTGTTGCC
	npy	Prepro-Neuropeptide Y	F_CGGTGAAACCAGAGAACCCCG	118	97.7	0.994	84.7 ± 0.2	XM_005932796.2
			R_CTGGATCTCTTCCCATACCTCTGTCT
	npyr2	Neuropeptide Y Receptor Type 2	F_TGACCATGGTGGTGGTCTTTGC	163	98.2	0.997	85.7 ± 0.2	XM_005929238.2
			R_TACAGGATGGGGTTGACGAATGTTG
	pacap	Pituitary Adenylate Cyclase Activating Polypeptide	F_CCGAAATCCCGGTGAGTTTCAGG	100	96.3	0.997	78.5 ± 0.1	XM_005922497.2
			R_ACGAGAGCTGAAGGTGAGGAGG
	pomc	Proopiomelanocortin	F_AGCAACATGATGGAGTGCATCCAG	104	99.4	0.999	80.1 ± 0.2	XM_014336932.1
			F_GCGTCTGATGGGACAGCGG
	pyy	Peptide YY	F_GCCAAATACTACACTGCCCTGAGAC	105	107	0.99	77.3 ± 0.3	XM_005949941.2
			R_ACCAAACAGCAGCTCTGCGAC
	trh	Thyrotropin Releasing Hormone	F_AGGATGAAGACGGAAGAAATGACGG	78	102.3	0.996	77.9 ± 0.2	XM_005938919.1
			R_ATCTCTTACCAGGGTGCTGTCG
	trhra	Thyrotropin Releasing Hormone Receptor Alpha	F_TCATCAATCCACTGCCTTCGGATC	147	98.4	0.996	83.5 ± 0.1	XM_005924321.1
			R_CCACAGCGAGCATCTTTGTCACC
	(*) R2, correlation coefficient of the slope of the standard curve.
